# Supplementary material for: Trichostatin A Affects Developmental Reprogramming of Bread Wheat Microspores towards an Embryogenic Route
Source: PubMed Central journal article supplement (PMC7693754; doi:10.3390/plants9111442), 2020-10-26
Supplement: plants-09-01442-s001.pdf [file plants-09-01442-s001.pdf]

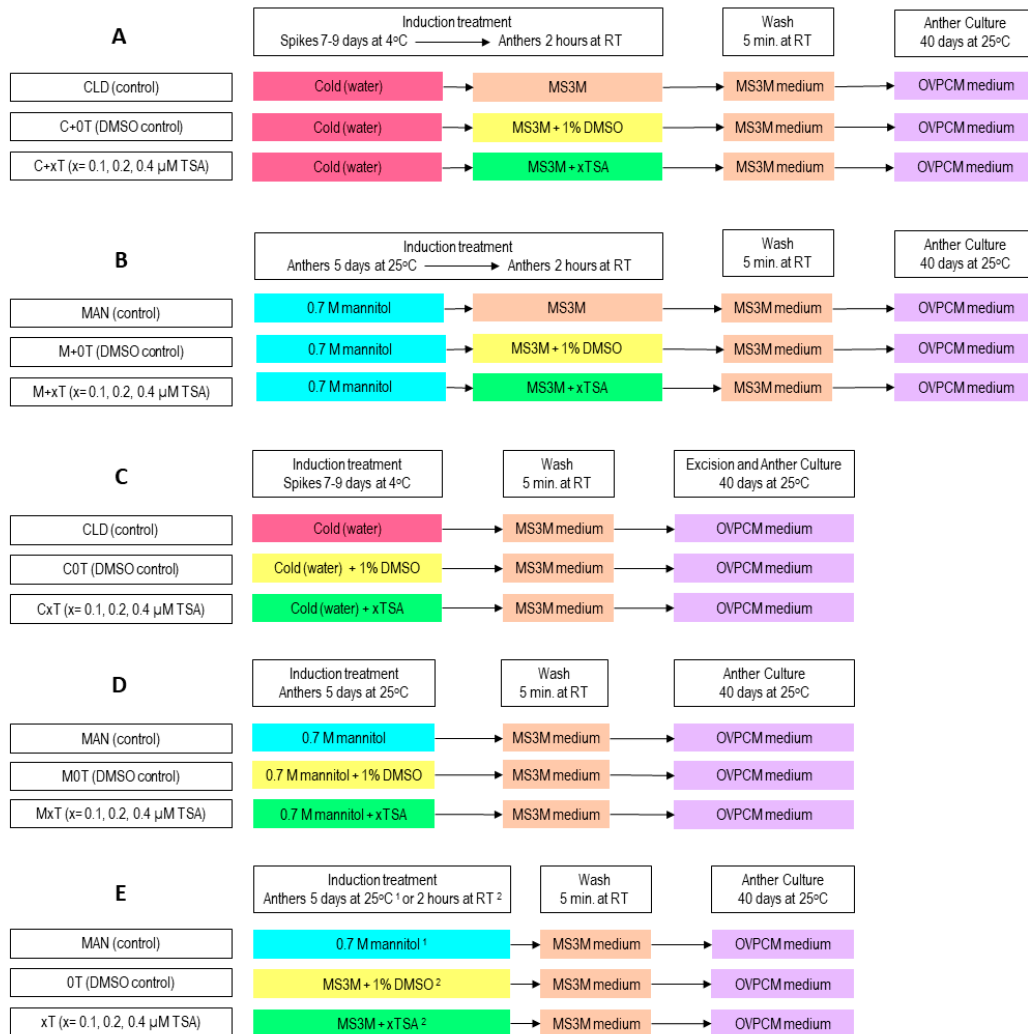

**Supplementary Figure 1.** Scheme of the diverse strategies used to induce microspore embryogenesis in wheat anther culture by the application of trichostatin A (TSA) in combination with or without different stress treatments. Concentrations of 0.1, 0.2, and 0.4 μM TSA dissolved in 1% DMSO (0.1T, 0.2T, and 0.4T), and control cultures with 0% DMSO (0T) were tested in all strategies. Anthers cultured with 0.7 M mannitol for 5 days at 25 °C or spikes at 4 °C for 7–9 days were used as control experiments depending on the strategy used. (A) Application of TSA after cold stress treatment, (B) application of TSA after mannitol stress treatment, (C) application of TSA in combination with cold stress treatment, (D) application of TSA in combination with mannitol stress treatment, and (E) application of TSA as a unique anther treatment. RT = 25 °C.
